# Supplementary material for: Supramolecular assembly of tetronic–adamantane and poly(β-cyclodextrin) as injectable shear-thinning hydrogels
Source: Royal Society of Chemistry journal article supplement (doi:10.1039/c9tb00072k), 2019-01-01
Supplement: c9tb00072k1.pdf [file c9tb00072k1.pdf]

## Electronic Supplementary Information

### **Shear-thinning Tetronic-adamantane/poly( $\beta$ -cyclodextrin) hydrogels as injectable biomaterials**

Hyo Jin Lee, Phuong Le Thi, Ho Joon Kwon and Ki Dong Park\*

Department of Molecular Science and Technology, Ajou University, 5 Woncheon, Yeongtong,  
Suwon, 443-749, Republic of Korea

\* Corresponding author

Department of Molecular Science and Technology, Ajou University, 5 Woncheon, Yeongtong,  
Suwon 443-749, Republic of Korea. Tel.: +82 31 219 1846; E-mail address: kdp@ajou.ac.kr

## Materials and Methods

### *Calculation of molar ratio between Ada and $\beta$ -CD*

The molar ratio of Ada and  $\beta$ -CD was calculated by the following equations:

MW of Tet-Ada monomer = 18709.00 g/mol

MW of dimer in poly( $\beta$ -CD) = 2326.03 g/mol

Mol of Ada in Tet-Ada = mol of Tet-Ada  $\times$  4

$$\text{Mol of Ada in 4 g of Tet-Ada} = 4 \text{ g} \times \frac{1 \text{ mol}}{18709.00 \text{ g}} \times 4$$

$$\text{Mol of } \beta\text{-CD in 1 g of poly}(\beta\text{-CD}) = \frac{1 \text{ g} \times \frac{1 \text{ mol}}{2326.03}}{2} \text{ g}$$

Molar ratio of Ada: $\beta$ -CD =  $8.55 \times 10^{-4}$ :  $8.60 \times 10^{-4}$

### *Measurement of Tetronic (Tet) micelles*

To determine the formation of Tet micelles, we measured the micelle size and size distribution using the Zetasizer Nano ZS (ZEN 3600, Malvern Instruments, Malvern, UK) at 25 and 37 °C. Tet solution was prepared in DIW at a concentration of 3 wt%. Prior to the measurement, the samples were filtered using a syringe filter (pore size of 0.45  $\mu$ m) and sonicated for 10 min.

### *Characterization of the porous structure of hydrogels*

The porous structure of hydrogels were performed using a scanning electron microscopy (FE-SEM; JSM 7100F, JEOL, Tokyo, Japan). Briefly, we fabricated 300  $\mu$ L of hydrogels in 1.5 mL microtubes at different pH (6.2 and 7.4) at 37 °C. Then, the samples were cut along the longitudinal section and lyophilized. The morphology of freeze-dried hydrogels was observed after sputter-coating with gold.

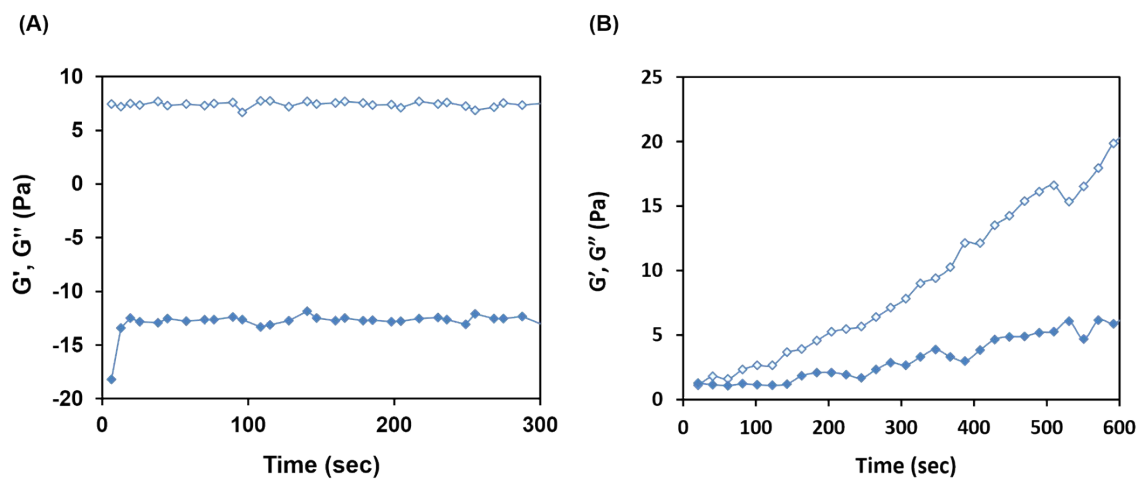

**Figure S1.** Oscillatory time sweep of Tet solution at 25 °C (A) and 37 °C (B). Storage modulus ( $G'$ , solid fill) and loss modulus ( $G''$ , no fill) were measured at 10 Hz, 1% strain.

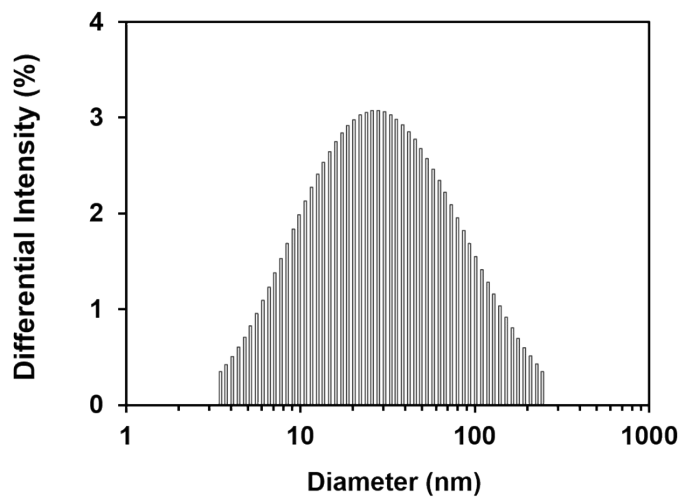

**Figure S2.** Size distribution of Tet micelles at 37 °C. The average diameter of micelles is 49.4 nm and the polydispersity index (PI) is 0.082.

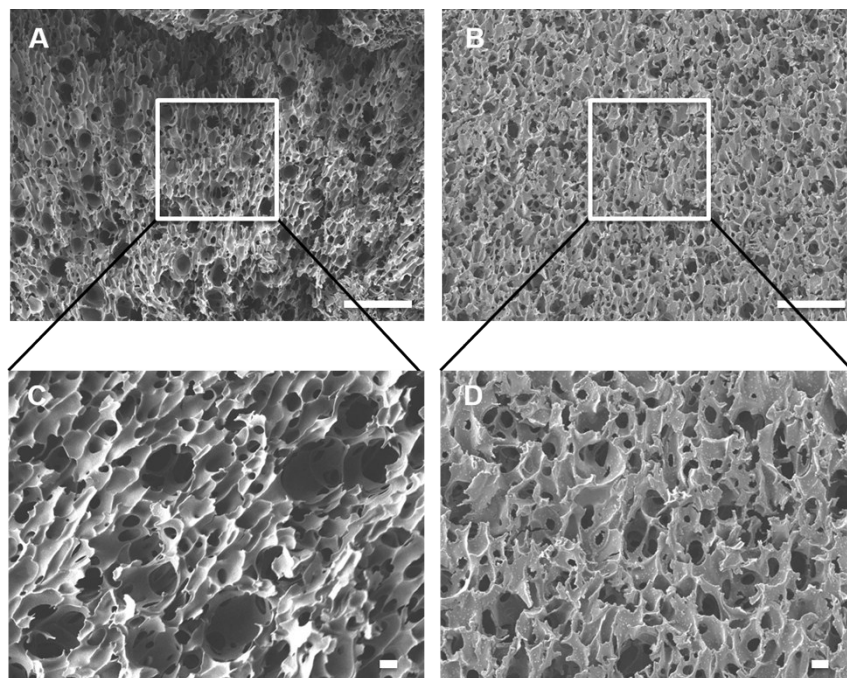

**Figure S3.** The inner pore structure of Tet-Ada/poly( $\beta$ -CD) hydrogels made from different media, pH 6.2 (A, C) and pH 7.4 (B, D). The scale bars represent 100  $\mu\text{m}$  (A, B) and 10  $\mu\text{m}$  (C, D).
